# Supplementary material
Source: PubMed Central journal article supplement (PMC3548038)
Supplement: NIHMS408261-supplement-1.pdf [file NIHMS408261-supplement-1.pdf]

**Table S1.** Detection frequency (%) of taxa identified by HOMIM microarray in exclusively formula or exclusively breastfed, three-month-old infants. Taxa are identified by species name or by their Human Oral Taxon (HOT) ([www.homd.org](http://www.homd.org)) number if unnamed, or by cluster group. Clusters are indicated by superscript numbers, with targeted taxa in the footnote. Differences between groups are shown as p-values from Chi<sup>2</sup> test and logistic regression after adjustment for mode of delivery. P-value adjustment for false discovery rates indicates differences with p-values <0.005 as statistically significant.

| Phylum                                                                    | Bacteria                                                           | Probe ID                               | Formula fed | Breast -fed | p-value               |                      |
|---------------------------------------------------------------------------|--------------------------------------------------------------------|----------------------------------------|-------------|-------------|-----------------------|----------------------|
|                                                                           |                                                                    |                                        |             |             | Chi <sup>2</sup> test | Logistic regression  |
| Firmicutes/Bacilli                                                        | <i>Streptococcus</i> Cluster I <sup>1</sup>                        | AB98                                   | 100.0       | 75.0        | 0.012                 | 0.998                |
|                                                                           | <i>Streptococcus</i> Cluster II <sup>2</sup>                       | Q59                                    | 57.1        | 100.0       | 0.000                 | 0.997                |
|                                                                           | <i>Streptococcus</i> Cluster III <sup>3</sup>                      | Q65                                    | 81.0        | 100.0       | 0.003                 | 0.997                |
|                                                                           | <i>Streptococcus anginosus/gordonii</i>                            | F49                                    | 0.0         | 6.8         | 0.221                 | 0.998                |
|                                                                           | <i>Streptococcus anginosus/intermedius</i> *                       | AB82, Q62                              | 92.2        | 100.0       | 0.145                 | 0.997                |
|                                                                           | <i>Streptococcus australis</i> *                                   | AB83, U50                              | 52.4        | 86.4        | 0.003                 | 0.05 <sup>D,BF</sup> |
|                                                                           | <i>Streptococcus constellatus/intermedius</i> *                    | AB77, F48                              | 0.0         | 18.2        | 0.037                 | 0.998                |
|                                                                           | <i>Streptococcus cristatus</i> *                                   | AD88, AD89                             | 57.1        | 40.9        | 0.220                 | 0.192                |
|                                                                           | <i>Streptococcus infantis</i> / <i>Streptococcus</i> sp. HOT 065   | Y74                                    | 76.2        | 54.5        | 0.093                 | 0.092                |
|                                                                           | <i>Streptococcus mitis</i> bv 2/ <i>Streptococcus</i> sp. HOT 069  | Q64                                    | 61.9        | 88.6        | 0.012                 | 0.021                |
|                                                                           | <i>Streptococcus mutans</i> *                                      | AC57, X04                              | 0.0         | 6.8         | 0.221                 | 0.998                |
|                                                                           | <i>Streptococcus oralis</i> / <i>Streptococcus</i> sp. HOT 064     | F46                                    | 100.0       | 100.0       | 1.000                 | -                    |
|                                                                           | <i>Streptococcus parasanguinis</i> I and II*                       | AB05, R17                              | 100.0       | 90.9        | 0.154                 | 0.998                |
|                                                                           | <i>Streptococcus salivarius</i> / <i>Streptococcus</i> sp. HOT 067 | E34                                    | 52.4        | 56.8        | 0.736                 | 0.972                |
|                                                                           | <i>Streptococcus sanguinis</i>                                     | AB78, AB75                             | 9.5         | 9.1         | 0.955                 | 0.508                |
|                                                                           | <i>Streptococcus</i> sp. HOT 070/071                               | N20                                    | 23.3        | 6.8         | 0.051                 | 0.896                |
|                                                                           | <i>Gemella haemolysans</i>                                         | K63                                    | 100.0       | 93.2        | 0.221                 | 0.998                |
|                                                                           | <i>Gemella morbillorum</i>                                         | K64                                    | 9.5         | 31.8        | 0.051                 | 0.198 <sup>D</sup>   |
|                                                                           | <i>Gemella sanguinis</i>                                           | AB17                                   | 0.0         | 2.3         | 0.486                 | 0.998                |
|                                                                           | Firmicutes/Clostridia                                              | <i>Granulicatella adiacens/elegans</i> | W81         | 57.1        | 15.9                  | 0.001                |
| <i>Granulicatella adiacens</i>                                            |                                                                    | AB30                                   | 42.9        | 13.6        | 0.009                 | 0.015                |
| <i>Granulicatella elegans</i> *                                           |                                                                    | AB29, AB28                             | 47.6        | 31.8        | 0.217                 | 0.030 <sup>D,#</sup> |
| <i>Lactobacillus</i> Cluster I <sup>4</sup>                               |                                                                    | W94                                    | 23.8        | 45.5        | 0.093                 | 0.804 <sup>D</sup>   |
| <i>Eubacterium yurii</i>                                                  |                                                                    | W84                                    | 0.0         | 6.8         | 0.221                 | 0.998                |
| <i>Eubacterium saburreum</i>                                              |                                                                    | W21                                    | 0.0         | 6.8         | 0.221                 | 0.998                |
| <i>Lachnospiraceae</i> [G-1] sp. HOT 082 ( <i>Eubacterium saburreum</i> ) |                                                                    | AB50                                   | 9.1         | 2.3         | 0.280                 | 0.548                |
| <i>Catonella morbi</i> / <i>Catonella</i> sp. HOT 164                     |                                                                    | O56                                    | 0.0         | 6.8         | 0.221                 | 0.998                |
| <i>Parvimonas micra</i> *                                                 |                                                                    | V05, L97                               | 4.8         | 11.4        | 0.390                 | 0.749                |
| <i>Dialister pneumosintes</i>                                             |                                                                    | X78                                    | 0.0         | 2.3         | 0.486                 | 0.998                |
| Firmicutes/Clostridia                                                     | <i>Megasphaera micronuciformis</i>                                 | AA57                                   | 4.8         | 0.0         | 0.145                 | 0.997                |
|                                                                           | <i>Megasphaera</i> sp. HOT 123                                     | AD11                                   | 28.6        | 0.0         | 0.000                 | 0.897                |
|                                                                           | <i>Selenomonas</i> Cluster I <sup>5</sup>                          | AC13                                   | 0.0         | 2.3         | 0.486                 | 0.998                |
|                                                                           | <i>Selenomonas infelix</i> / <i>Selenomonas</i> sp. HOT 126/481    | O54                                    | 4.8         | 15.9        | 0.201                 | 0.226                |
|                                                                           | <i>Selenomonas noxia</i>                                           | AC04                                   | 0.0         | 2.3         | 0.486                 | 0.998                |

|                         |                                                                     |            |       |      |       |                       |
|-------------------------|---------------------------------------------------------------------|------------|-------|------|-------|-----------------------|
|                         | <i>Selenomonas sputigena</i>                                        | AB04       | 4.8   | 2.3  | 0.587 | 0.900                 |
|                         | <i>Solobacterium moorei</i> *                                       | AC01, AC02 | 61.9  | 2.3  | 0.000 | 0.003 <sup>D,FF</sup> |
|                         | <i>Veillonella atypica/parvula</i>                                  | Q67        | 100.0 | 86.8 | 0.076 | 0.998                 |
|                         | <i>Veillonella atypica</i> *                                        | W88, W04   | 100.0 | 54.4 | 0.000 | 0.998 <sup>D</sup>    |
|                         | <i>Veillonella</i> sp. EF509966 (intestinal isolate)                | AD63-C     | 23.8  | 47.7 | 0.066 | 0.240                 |
|                         | <i>Veillonella parvula</i>                                          | AC37, M04  | 90.5  | 77.3 | 0.199 | 0.115                 |
|                         | <i>Veillonella</i> sp. HOT 780                                      | AD02       | 95.2  | 34.1 | 0.000 | 0.001                 |
|                         | <i>Veillonellaceae</i> [G-1] sp. HOT 155                            | AB58       | 0.0   | 2.3  | 0.486 | 0.998                 |
|                         | <i>Veillonellaceae</i> [G1] sp. HOT 135/148                         | W86        | 0.0   | 2.3  | 0.614 | 0.998                 |
| <b>Actinobacteria</b>   | <i>Actinomyces</i> Cluster I <sup>6</sup>                           | AB35       | 0.0   | 18.2 | 0.037 | 0.998                 |
|                         | <i>Actinomyces</i> Cluster II <sup>7</sup>                          | AC99       | 23.8  | 4.5  | 0.019 | 0.054                 |
|                         | <i>Actinomyces gerencseriae</i>                                     | E46        | 33.3  | 88.6 | 0.000 | 0.000                 |
|                         | <i>Actinomyces</i> sp. HOT 175                                      | P91        | 9.5   | 2.3  | 0.193 | 0.494                 |
|                         | <i>Corynebacterium matruchotii</i>                                  | AB96       | 0.0   | 4.5  | 0.321 | 0.998                 |
|                         | <i>Rothia mucilaginosa</i> *                                        | AB62, AB63 | 61.9  | 52.3 | 0.465 | 0.648                 |
|                         | <i>Rothia dentocariosa/mucilaginosa</i>                             | E52        | 52.4  | 61.4 | 0.492 | 0.630                 |
|                         | <i>Propionibacterium propionicum</i>                                | AB71       | 0.0   | 4.5  | 0.321 | 0.998                 |
|                         | <i>Bifidobacterium animalis</i> ss. <i>animalis</i> / <i>lactis</i> | AC27       | 4.8   | 11.4 | 0.390 | 0.998                 |
|                         | <i>Atopobium parvulum</i>                                           | X29        | 4.0   | 0.0  | 0.145 | 0.997                 |
|                         | <i>Slackia exigua</i>                                               | AB52       | 47.6  | 43.2 | 0.736 | 0.120 <sup>D</sup>    |
| <b>Fusobacterium</b>    | <i>Fusobacterium nucleatum</i> ss. <i>animalis/nucleatum</i>        | AE01       | 33.9  | 29.5 | 0.757 | 0.776                 |
|                         | <i>Fusobacterium periodonticum</i>                                  | R20        | 23.8  | 6.8  | 0.051 | 0.169                 |
|                         | <i>Leptotrichia buccalis/goodfellowii/Sneathia sanguinegens</i>     | AA45       | 57.1  | 13.6 | 0.000 | 0.007 <sup>D,BF</sup> |
|                         | <i>Leptotrichia hofstadii</i> *                                     | AA58, Y55  | 14.3  | 2.3  | 0.059 | 0.240                 |
|                         | <i>Leptotrichia</i> sp. HOT 215                                     | AA59       | 4.8   | 0.0  | 0.145 | 0.997                 |
| <b>Bacteroidetes</b>    | <i>Bacteroidetes</i> phylum *                                       | X57, K76   | 0.0   | 4.5  | 0.321 | 0.998                 |
|                         | <i>Porphyromonas catoniae/Porphyromonas</i> sp. HOT 279             | N95        | 9.5   | 0.0  | 0.038 | 0.997                 |
|                         | <i>Porphyromonas endodontalis</i>                                   | W78        | 4.8   | 0.0  | 0.145 | 0.997                 |
|                         | <i>Tannerella forsythia</i>                                         | X56        | 9.5   | 0.0  | 0.038 | 0.997                 |
|                         | <i>Prevotella</i> Cluster I <sup>8</sup>                            | Y65        | 0.0   | 6.8  | 0.221 | 0.998                 |
|                         | <i>Prevotella</i> Cluster IV <sup>9</sup>                           | AA44       | 33.3  | 2.3  | 0.000 | 0.014                 |
|                         | <i>Prevotella loescheii/Prevotella</i> sp. HOT 472                  | Y64        | 0.0   | 6.8  | 0.221 | 0.998                 |
|                         | <i>Prevotella melaninogenica/histicola</i>                          | T81        | 28.6  | 2.3  | 0.001 | 0.025                 |
|                         | <i>Prevotella nigrescens</i>                                        | W40        | 0.0   | 4.5  | 0.321 | 0.998                 |
|                         | <i>Prevotella multisaccharivorax</i>                                | AC59       | 19.0  | 0.0  | 0.003 | 0.997                 |
|                         | <i>Prevotella</i> sp. HOT 308                                       | Q94        | 4.8   | 0.0  | 0.145 | 0.997                 |
|                         | <i>Capnocytophaga granulosa/Capnocytophaga</i> sp. HOT 326          | AA89       | 0.0   | 6.8  | 0.221 | 0.998                 |
|                         | <i>Capnocytophaga sputigena</i>                                     | W46        | 4.8   | 4.5  | 0.969 | 0.656                 |
| <b>Proteobacteriuma</b> | <i>Kingella oralis</i>                                              | AA77       | 47.6  | 4.5  | 0.000 | 0.004                 |
|                         | <i>Kingella oralis</i> and <i>Neisseria</i>                         | O86        | 47.6  | 2.3  | 0.000 | 0.003                 |
|                         | <i>Neisseria</i> Cluster I <sup>10</sup>                            | Y60        | 4.8   | 0.0  | 0.145 | 0.997                 |
|                         | <i>Neisseria elongata</i>                                           | AA75       | 0.0   | 4.5  | 0.321 | 0.998                 |
|                         | <i>Neisseria flavescens</i>                                         | AA76       | 42.9  | 0.0  | 0.000 | 0.997                 |
|                         | <i>Neisseria gonorrhoea/ polysaccharea</i>                          | O76        | 33.3  | 0.0  | 0.000 | 0.998                 |
|                         | <i>Lautropia mirabilis</i>                                          | X44        | 33.3  | 2.3  | 0.000 | 0.021                 |

|                    |                                                            |           |      |      |       |                       |
|--------------------|------------------------------------------------------------|-----------|------|------|-------|-----------------------|
|                    | <i>Cardiobacterium hominis</i>                             | O97       | 0.0  | 9.1  | 0.154 | 0.998                 |
|                    | <i>Pseudomonas</i> Cluster I <sup>11</sup>                 | O96       | 9.5  | 6.8  | 0.702 | 0.761                 |
|                    | <i>Aggregatibacter segnis/Aggregatibacter</i> sp. HOT 512* | AA78, P05 | 0.0  | 2.3  | 0.486 | 0.998                 |
|                    | <i>Aggregatibacter actinomycetemcomitans</i>               | P02       | 14.3 | 0.0  | 0.010 | 0.997                 |
|                    | <i>Haemophilus parainfluenzae</i>                          | W79       | 57.1 | 34.1 | 0.078 | 0.321 <sup>D</sup>    |
|                    | <i>Haemophilus</i> sp. HOT 035/ 036*                       | AA97, X31 | 66.7 | 13.6 | 0.000 | 0.001 <sup>D,FF</sup> |
|                    | <i>Campylobacter</i> Cluster I <sup>12</sup>               | T87       | 9.5  | 11.4 | 0.823 | 0.972                 |
|                    | <i>Campylobacter concisus</i>                              | O46       | 9.5  | 4.5  | 0.435 | 0.885                 |
|                    | <i>Campylobacter concisus/rectus</i> *                     | X36, T86  | 38.1 | 15.9 | 0.047 | 0.065                 |
|                    | <i>Campylobacter gracilis</i> *                            | Q04, X34  | 9.5  | 11.4 | 0.823 | 0.442                 |
|                    | <i>Campylobacter showae</i> *                              | W36, X35  | 0.0  | 6.8  | 0.221 | 0.998                 |
| <b>TM7</b>         | TM7 [G-1] sp. HOT 347/349*                                 | Y77, W85  | 47.6 | 6.8  | 0.000 | 0.007                 |
|                    | TM7 [G-5] sp. HOT 356/437 *                                | O32, AC48 | 0.0  | 2.3  | 0.486 | 0.998                 |
| <b>Synergistes</b> | <i>Synergistes</i> [G-3] sp. HOT359                        | AC53      | 9.5  | 0.0  | 0.038 | 0.997                 |

1) *Streptococcus* Cluster I (probe AB98) targets *S. mitis* biovar 2, *S. peroris*, *S. pneumonia*, *Streptococcus* sp. HOT 423.

2) *Streptococcus* Cluster II (probe Q59) targets *S. salivarius*, *S. sanguinis*, *Streptococcus* sp. HOT 070/071

3) *Streptococcus* Cluster III (probe Q65) targets *S. salivarius*, *S. sanguinis*, *S. sinensis*, *S. sobrinus*.

4) *Lactobacillus* Cluster I (probe W94) targets *L. casei*, *L. paracasei*, *L. rhamnosus*.

5) *Selenomonas* Cluster I (probe AC13) targets *S. infelix*, *Selenomonas* sp. HOT 126/479/481.

6) *Actinomyces* Cluster I (probe AB35) targets *A. meyeri*, *A. odontolyticus*, *A. oricola*, *A. naeslundii* *Ilviscosus*.

7) *Actinomyces* Cluster II (probe AC99) targets *A. meyeri*, *A. odontolyticus*, *Actinomyces* sp. HOT 180/181.

8) *Prevotella* Cluster I (probe Y65) targets *P. loescheii*, *Prevotella* sp. HOT 317/472/Y65

9) *Prevotella* Cluster IV (probe AA44) targets *P. loescheii*, *P. nigrescens*, *P. pallens*, *Prevotella* sp. HOT 782.

10) *Neisseria* Cluster I (probe Y60): *N. gonorrhoeae*, *N. meningitidis*, *N. polysaccharea*.

11) *Pseudomonas* Cluster I (probe O96) targets *P. aeruginosa*, *P. fluorescens*, *P. pseudoalcaligenes*, *P. otitidis*.

12) *Campylobacter* Cluster I (probe T87) targets *C. curvus*, *C. rectus*, *C. showae*.

\* Two or more different probes with positive signals for the same species were combined

D) Species detection was independently associated with mode of delivery.

BF) Species detection prevalence was higher in breastfed than formula fed infants in both vaginally and Caesarean section delivered infants when analyse separately in mode of delivery strata

FF) Species detection prevalence was higher in formula fed than breastfed infants in both vaginally and Caesarean section delivered infants when analysed separately in mode of delivery strata

# Species detection was more prevalent in formula fed vaginally delivered infants, but more prevalent in breastfed Caesarean section delivered infants when analysed separately in mode of delivery strata
